# Supplementary material for: Investigating the Early Events after Skin-Barrier Disruption Using Microdialysis—A Human Ex Vivo Skin Model
Source: MDPI journal article supplement (doi:10.3390/dermato1020008), 2021-11-30
Supplement: s1 [file s1]

## Supplementary Material

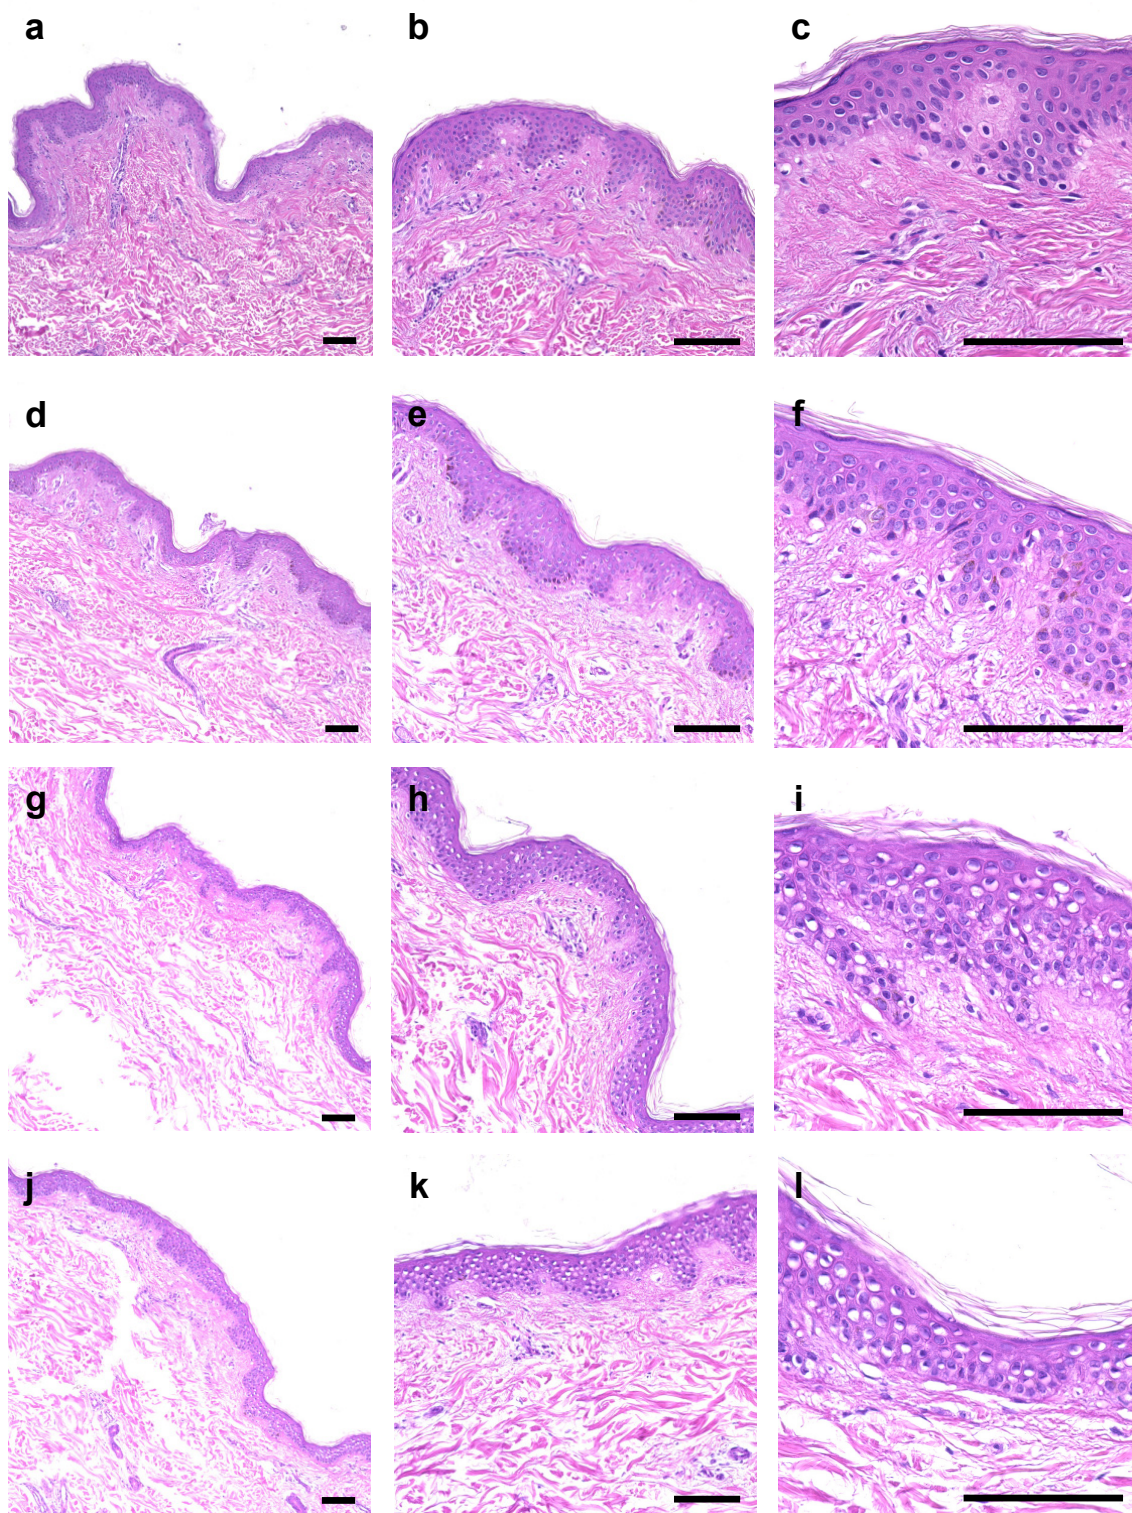

**Figure S1.** Changes in skin morphology in response to incubation time. H&E-stained sections made from skin specimens after incubation for (a–c) 0 hour (i.e. extracted directly after skin preparation), (d–f) 24 hours, (g–i) 48 hours, and (j–l) 72 hours. Three representative pictures in different magnifications are shown for each time point, with the scale bar representing 100  $\mu\text{m}$ .



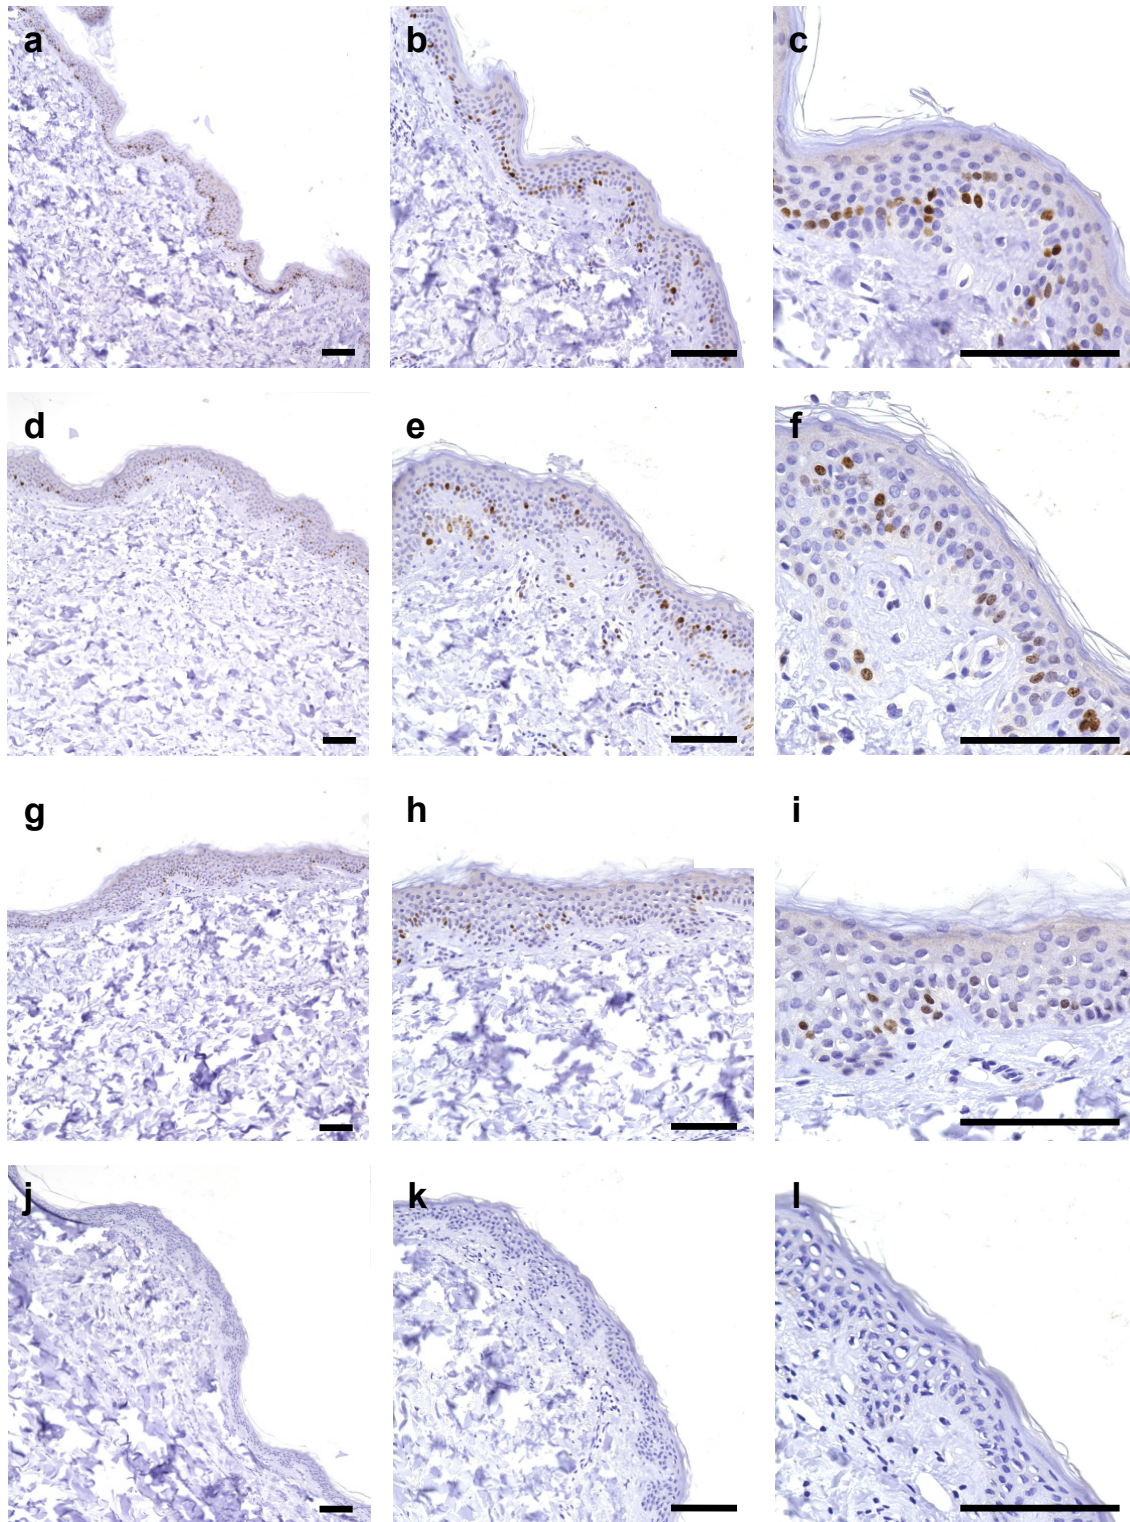

**Figure S2.** Changes in Ki67 expression in response to incubation time. Ki67-immunostaining of skin specimens incubated for (a–c) 0 hour (i.e. extracted directly after skin preparation), (d–f) 24 hours, (g–i) 48 hours, and (j–l) 72 hours. Three representative pictures in different magnifications are shown for each time point, with the scale bar representing 100 μm.
